# Supplementary material
Source: Springer Nature journal article supplement (https://www.springermedizin.de/resource/supplementary/12913_2012_2524_MOESM2_ESM.pdf/9530846)

- Legend**
- Facility EmOC status**
- ◆ Non
  - Basic
  - Comprehensive
  - Major Road
  - ==== Minor Road
  - Divisional Boundary

**Population Density**

|           |         |
|-----------|---------|
| LANGOBAYA | 32,238  |
| MARAFA    | 54,277  |
| MAGARINI  | 96,882  |
| MALINDI   | 217,117 |

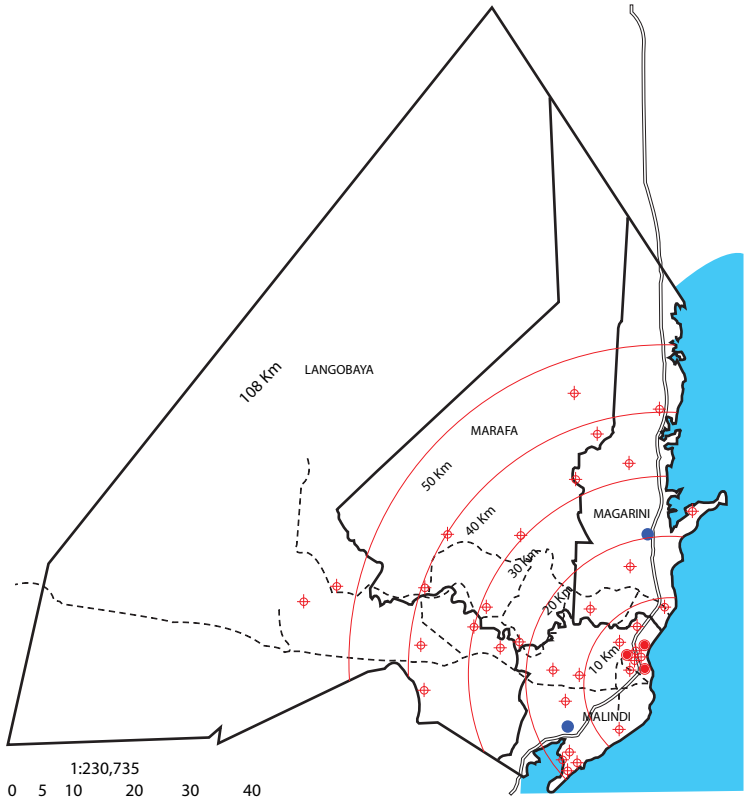

**Indian Ocean**

1:230,735

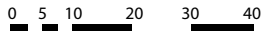

Supplement: MOESM2 [file 9530846]
